# Supplementary material for: Self-assembly of alumina nanowires into controllable micro-patterns by laser-assisted solvent spreading: towards superwetting surfaces
Source: Royal Society of Chemistry journal article supplement (doi:10.1039/c4ce01434k), 2014-08-22
Supplement: c4ce01434k1.pdf [file c4ce01434k1.pdf]

## Supporting information

### Self-assembly of Alumina Nanowires into Controllable Micro-Patterns by Laser-assisted Solvent Spreading: towards Superwetting Surfaces

Meiling Lv,<sup>a</sup> Qianbin Wang,<sup>a</sup> Qing'an Meng,<sup>a</sup> Tianyi Zhao,<sup>\*a</sup> Huan Liu,<sup>\*a</sup> Lei Jiang<sup>a,b</sup>

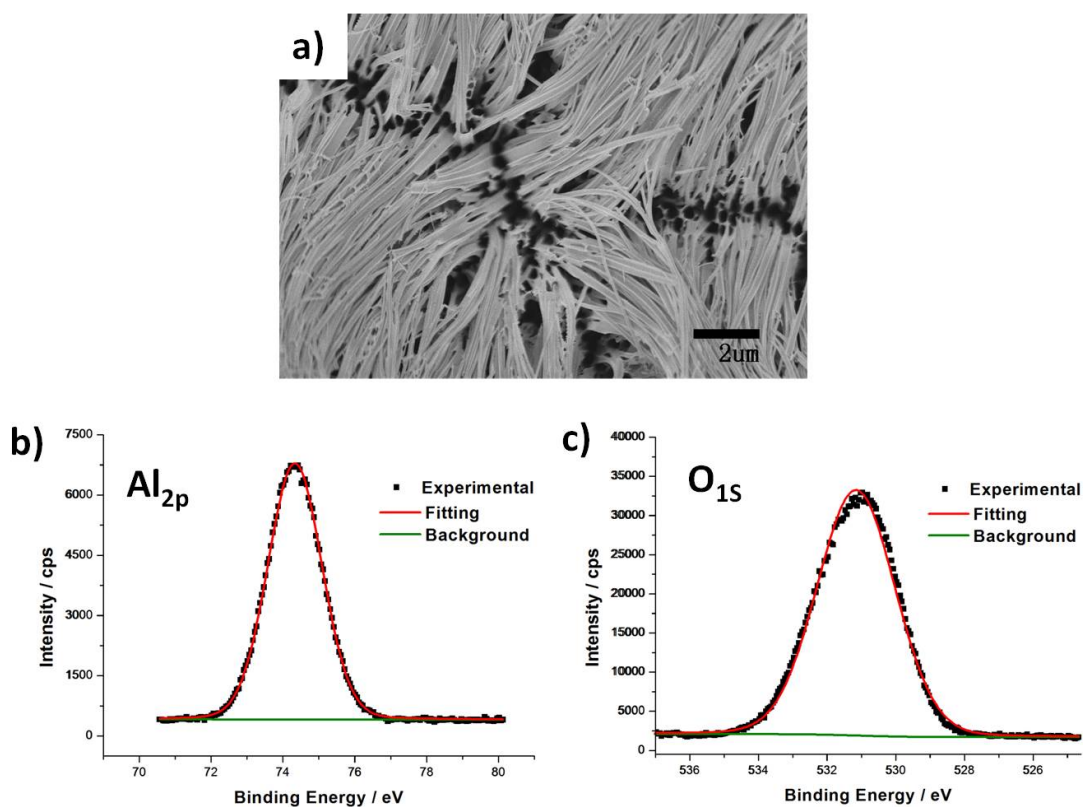

Figure S1: a) high magnified SEM image of the as-prepared alumina nanowires. b) and c) X-ray photoelectron Spectroscopy of the as-prepared alumina nanowires, and the characteristic peaks of Al<sub>2p</sub> and O<sub>1s</sub> were clearly observed.
